# Supplementary material
Source: PubMed Central journal article supplement (PMC3201807)

Figure S1

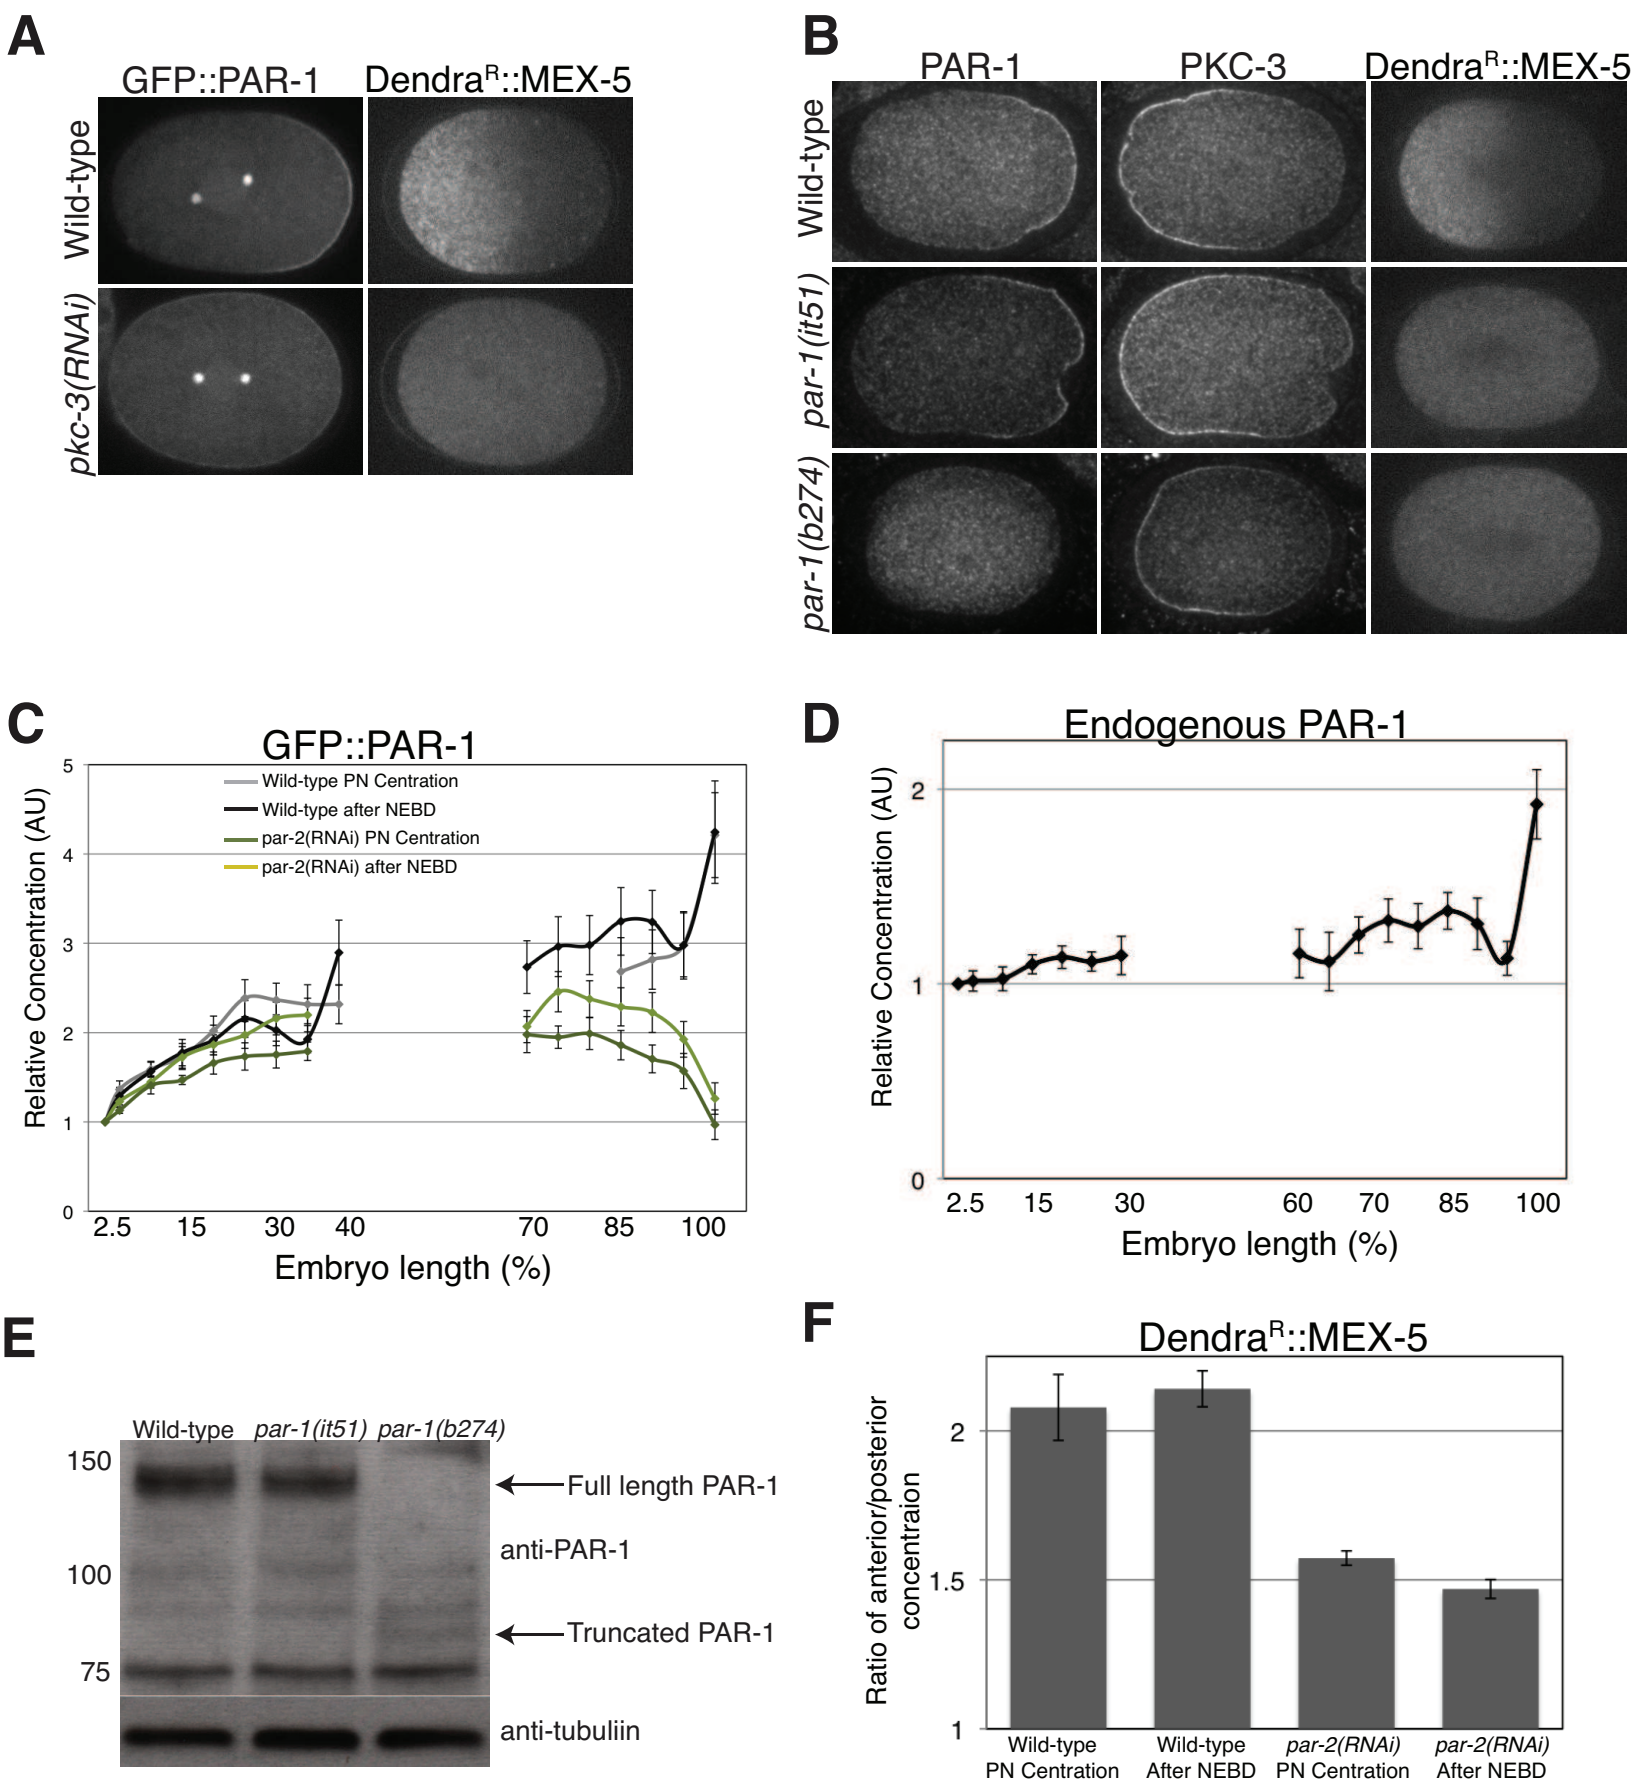

## Figure S2

**A**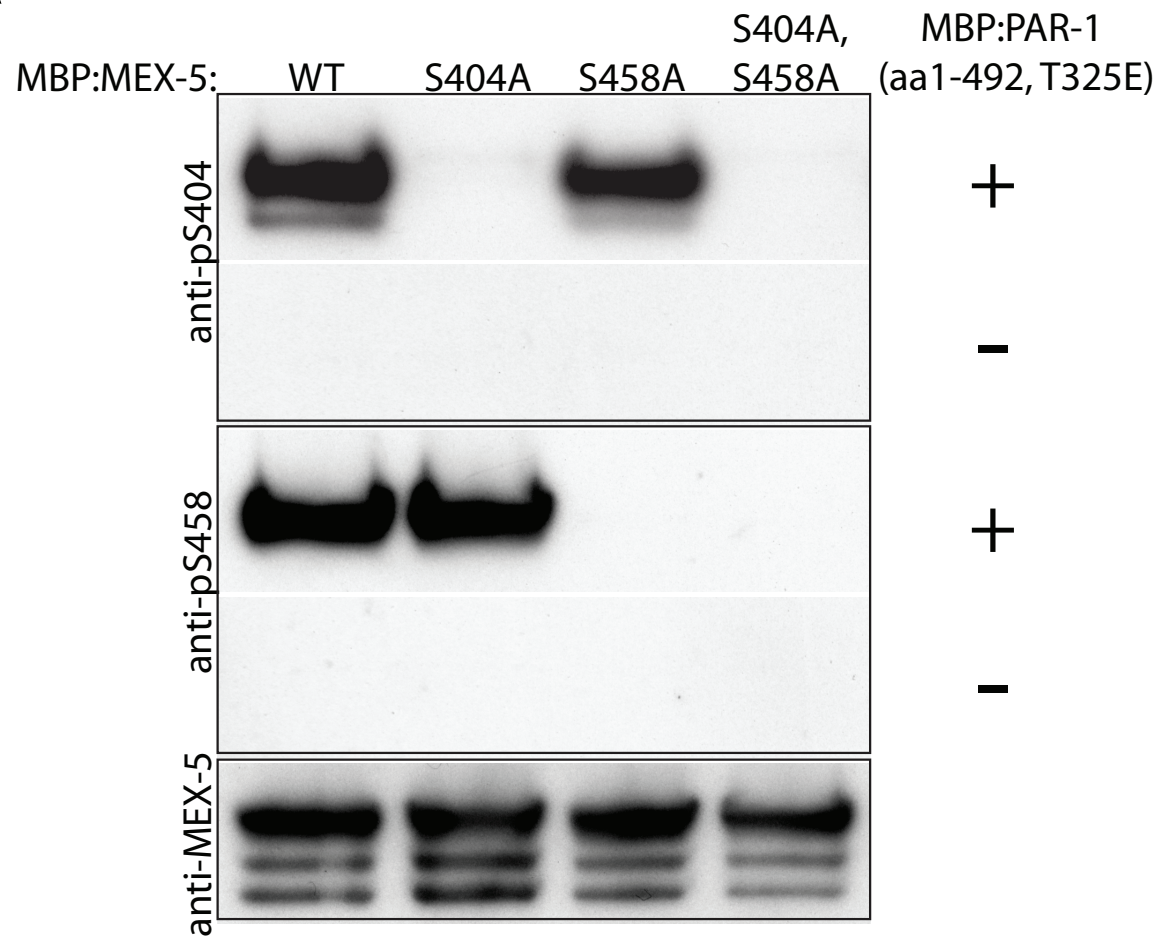**B**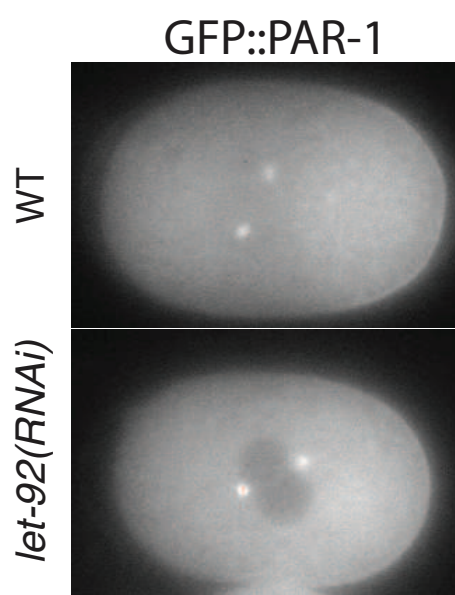**C**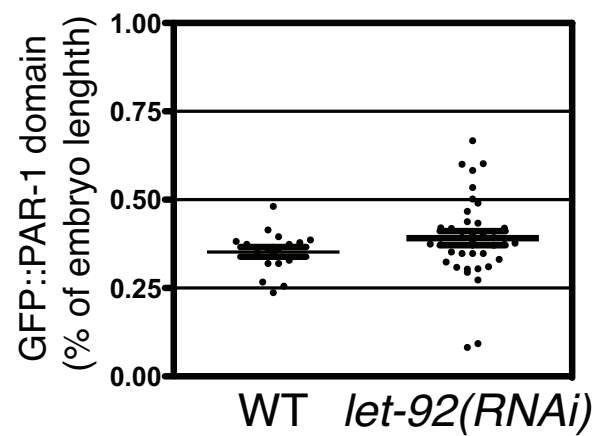

Figure S3

**A**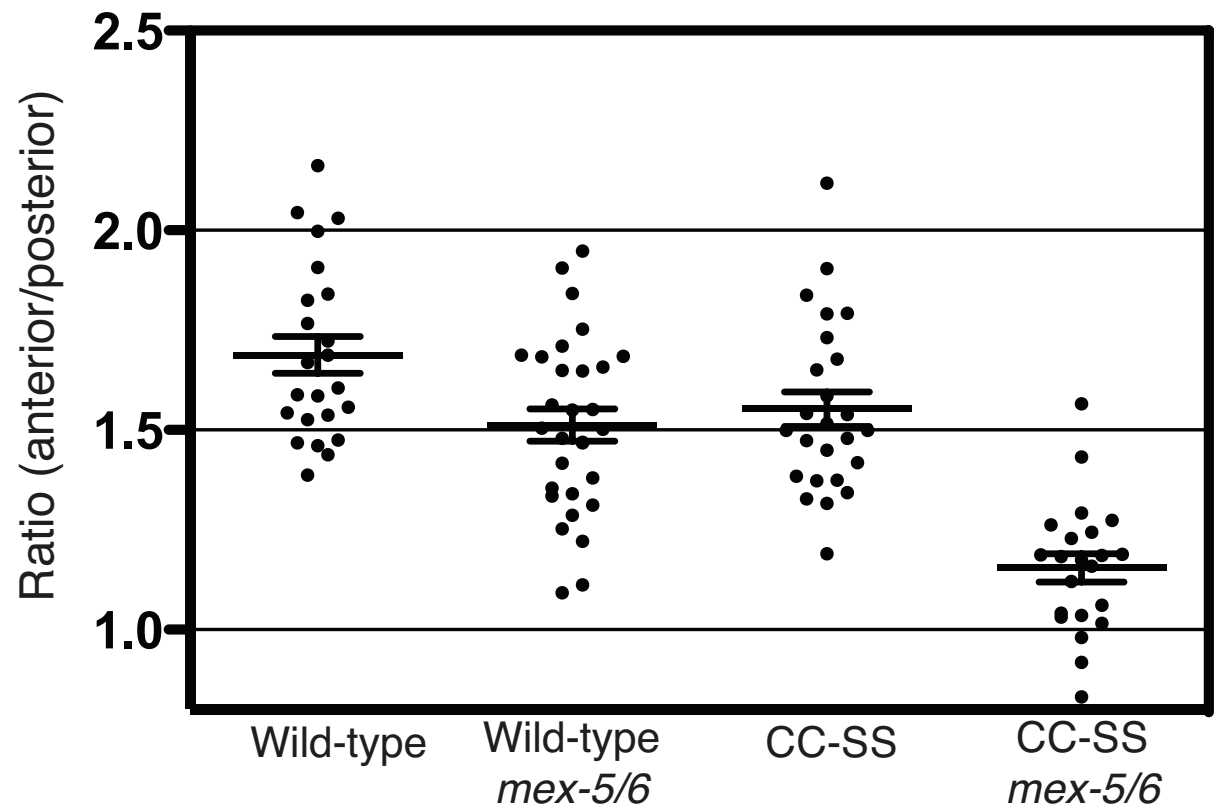**B**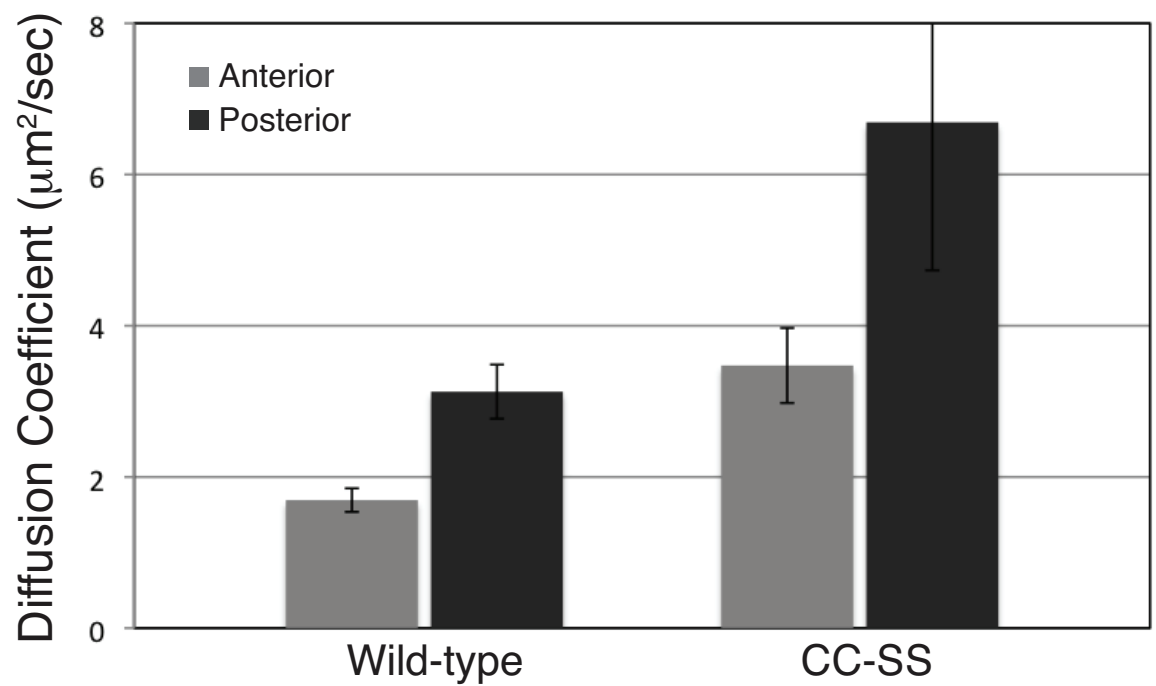

Figure S4

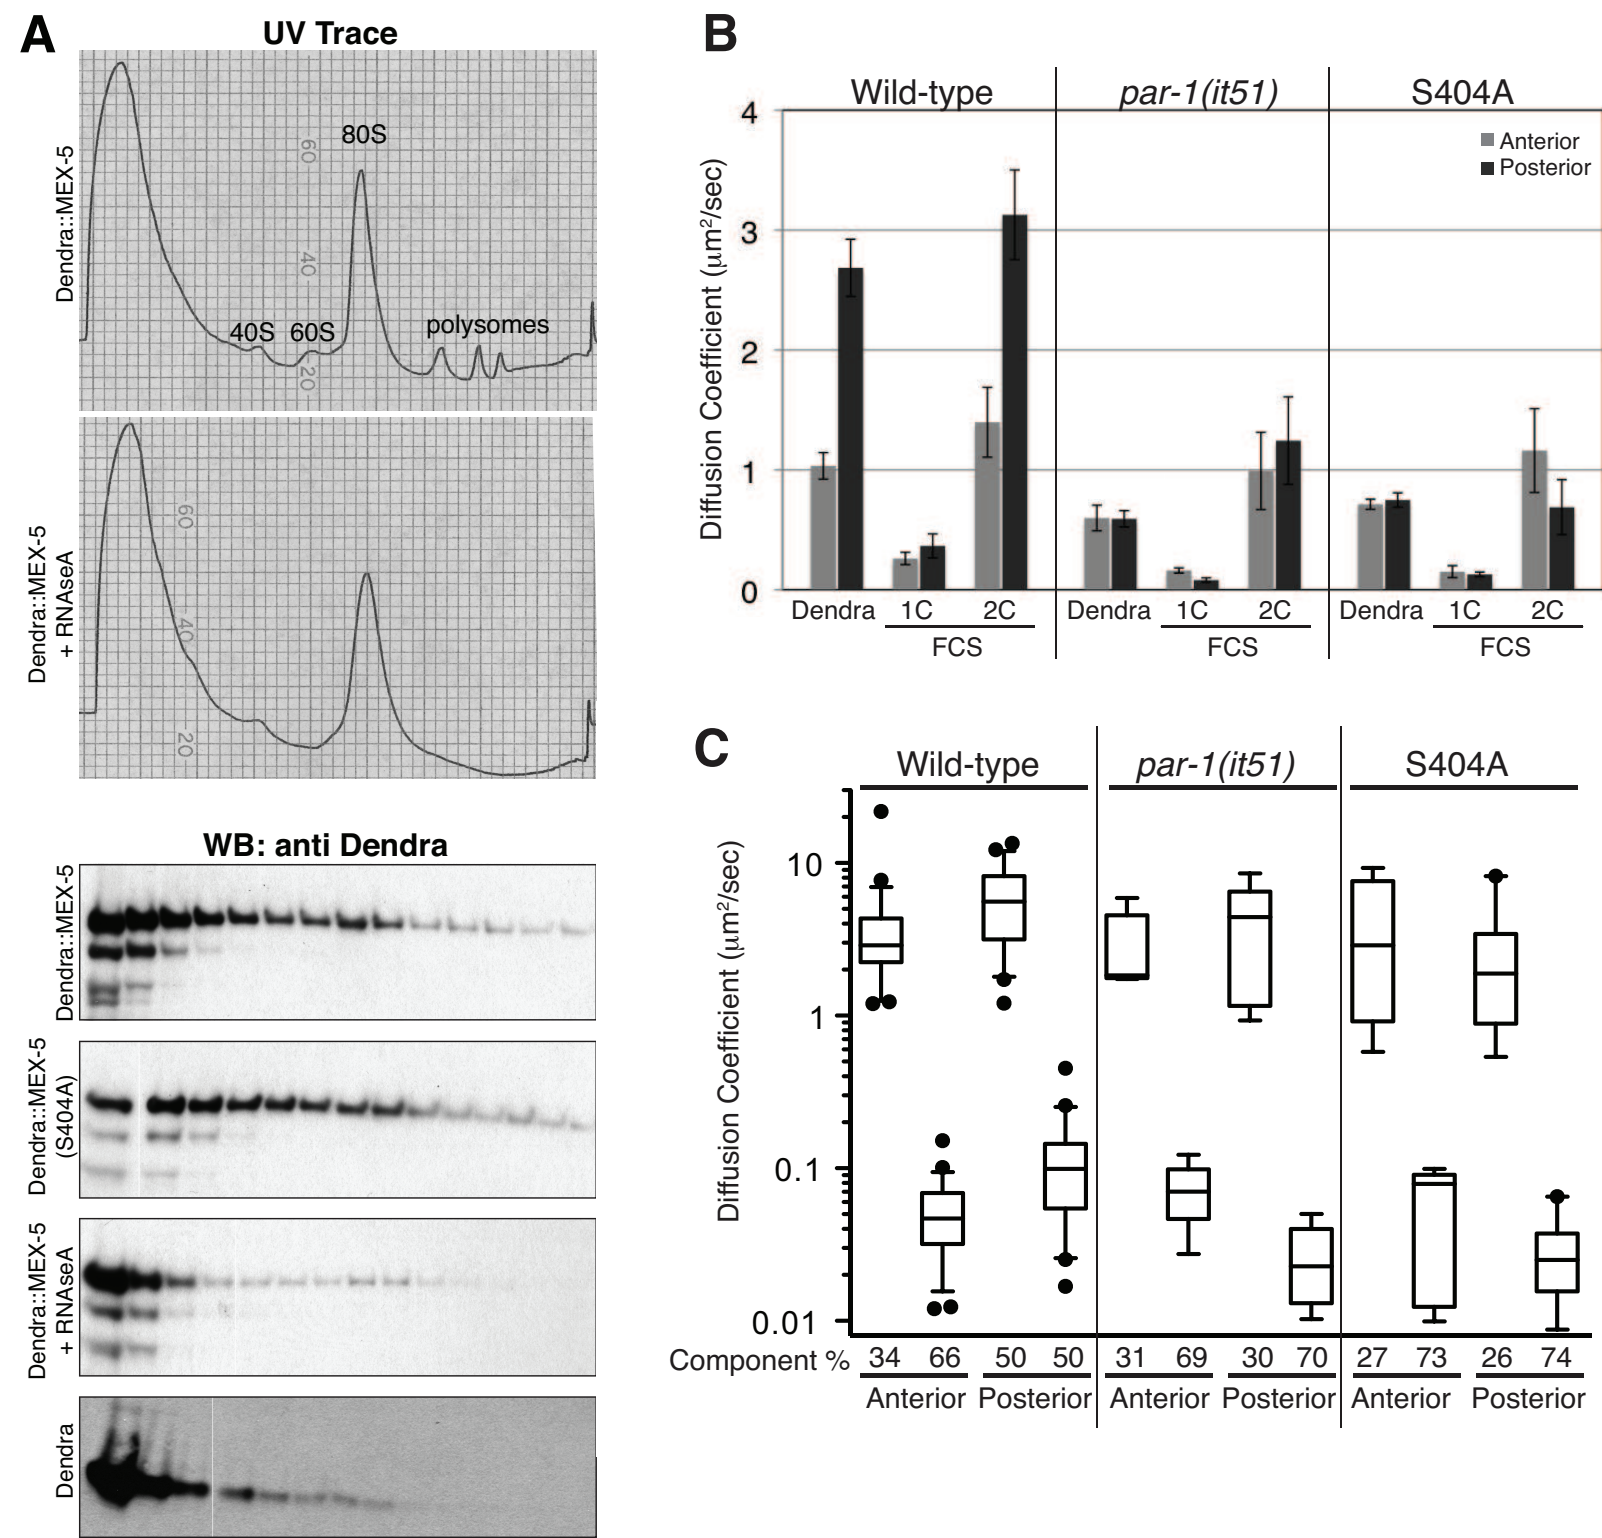

Figure S5

## Cytoplasmic PAR-1 Model

A

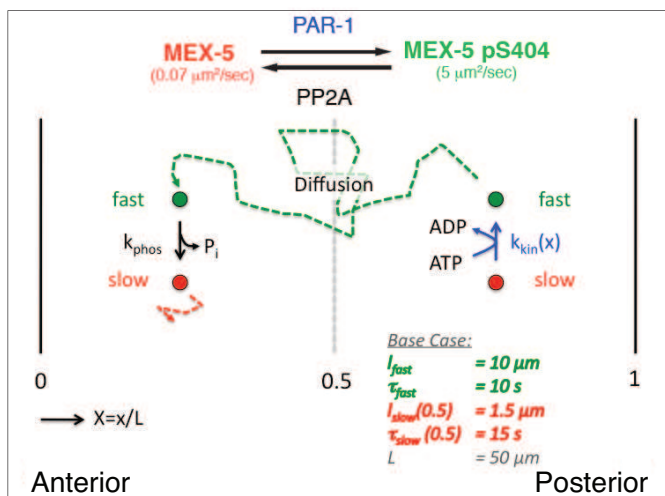

G

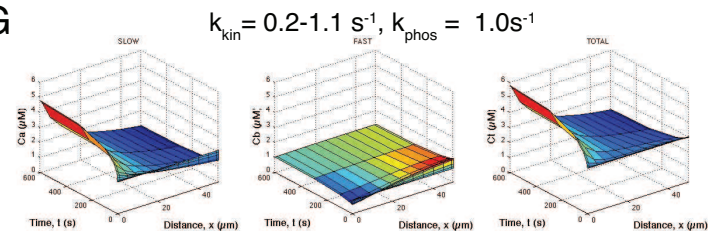

H

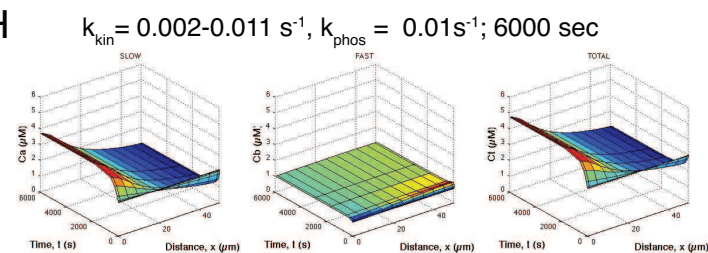

B

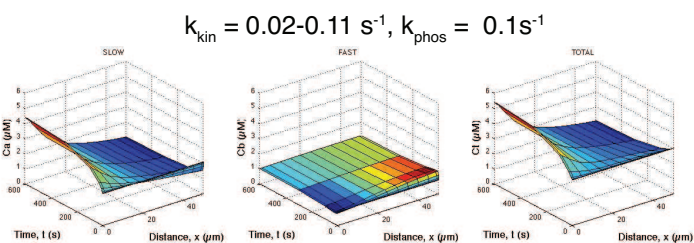

I

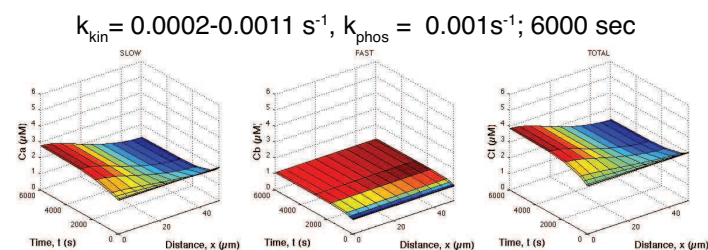

C

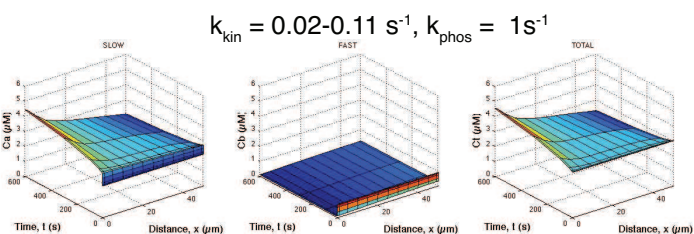

J

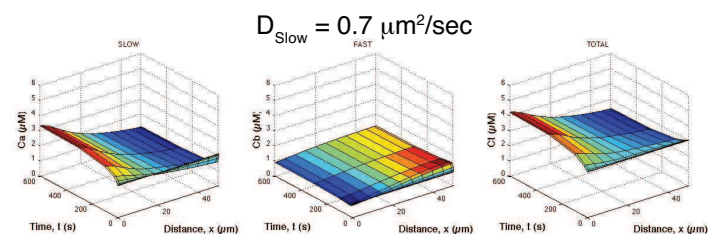

D

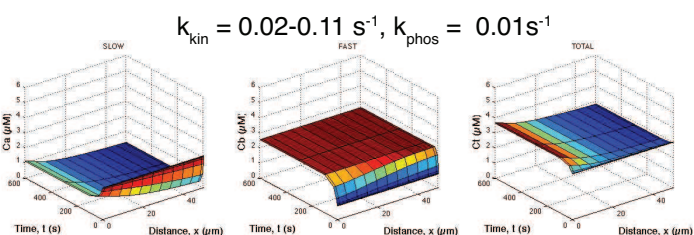

K

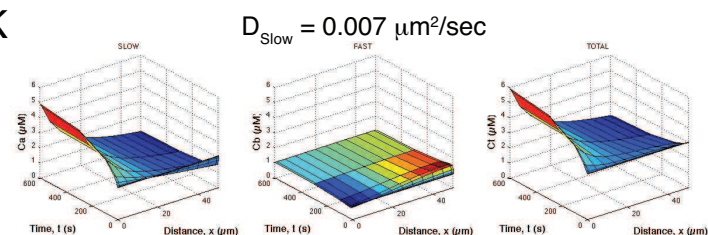

E

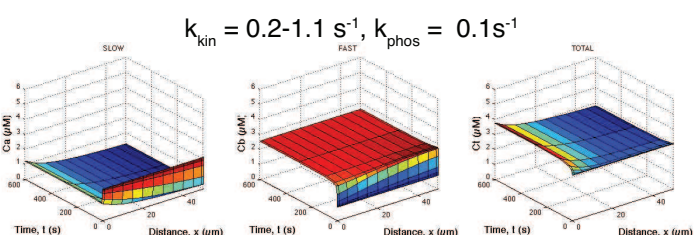

L

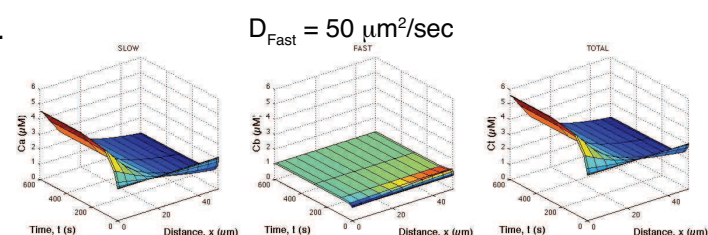

F

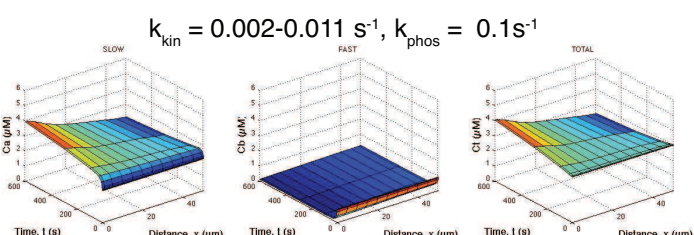

M

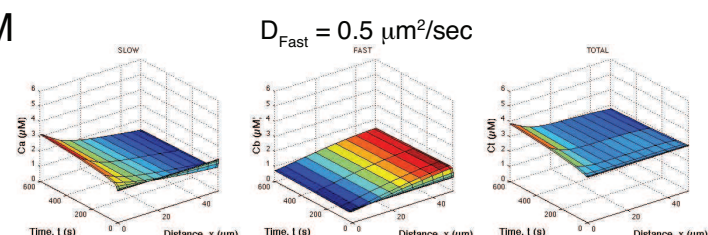

Figure S6

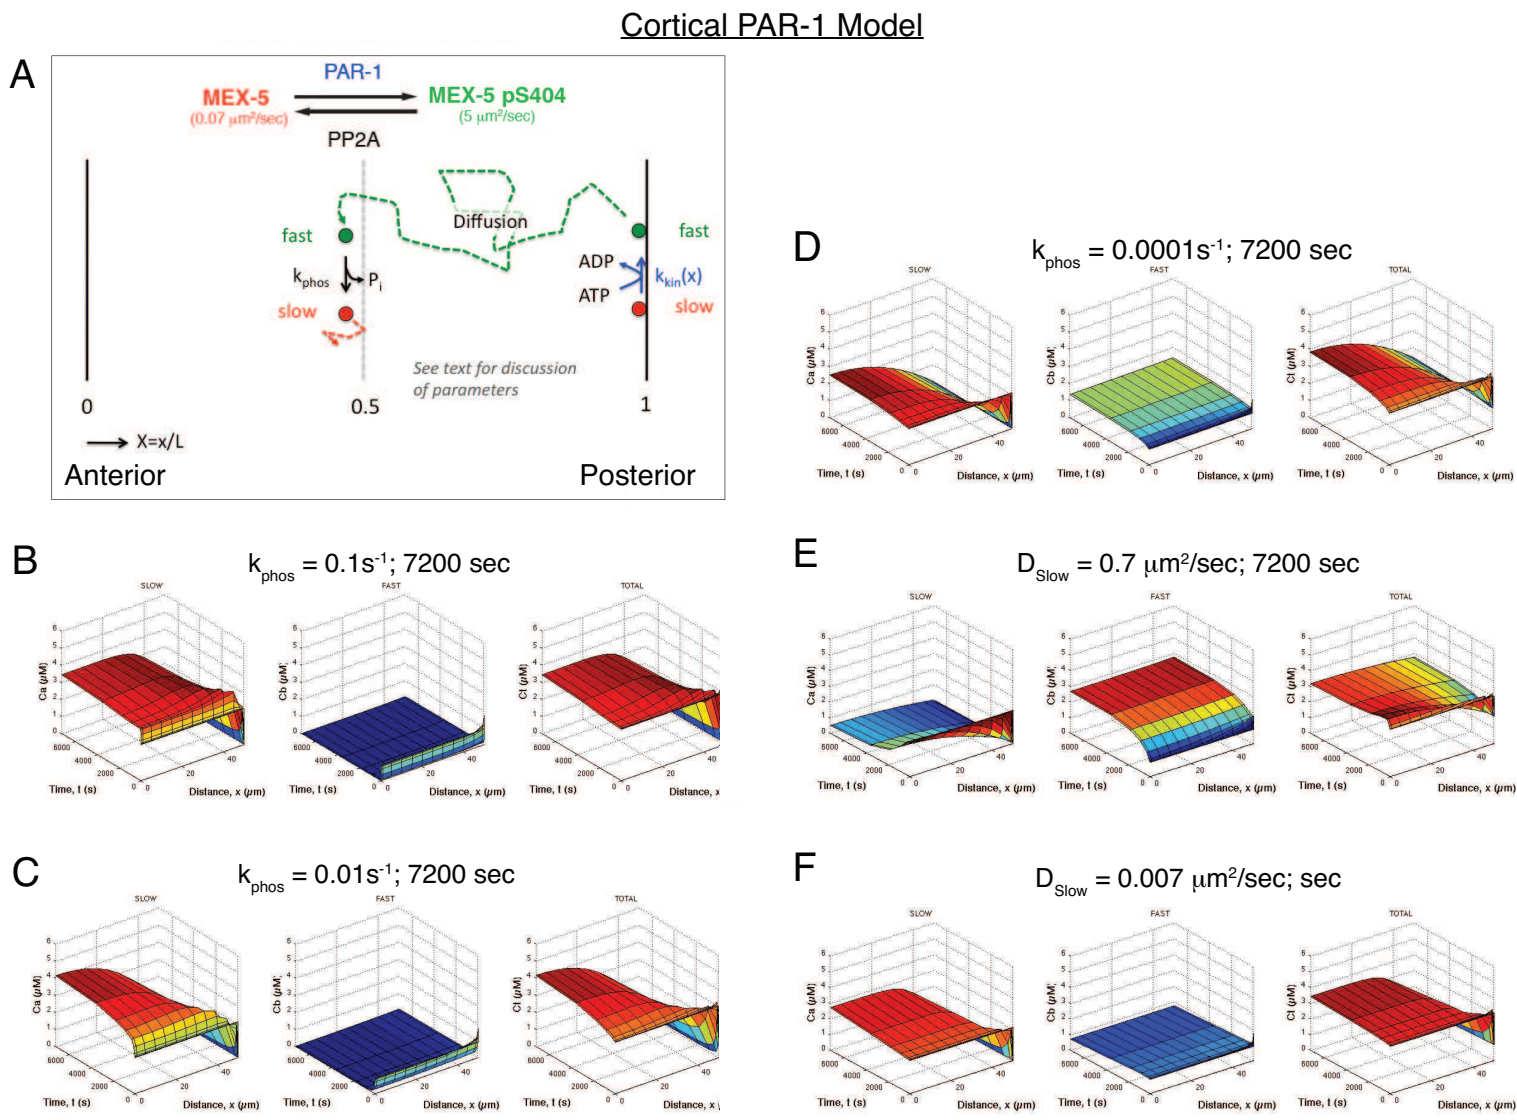

Supplement: NIHMS327873-supplement-02.pdf [file NIHMS327873-supplement-02.pdf]
